# Supplementary material for: Unravelling the chemical design of spin-crossover nanoparticles based on iron(ii)–triazole coordination polymers: towards a control of the spin transition
Source: Royal Society of Chemistry journal article supplement (doi:10.1039/c5tc01093d), 2015-01-01
Supplement: c5tc01093d1.pdf [file c5tc01093d1.pdf]

## **Unravelling synthetic key parameters for the design of spin-crossover nanoparticles based on iron(II)-triazole coordination polymers: towards a control of the spin transition**

Mónica Giménez-Marqués, M. Luisa García-Sanz de Larrea and Eugenio Coronado\*.

*Instituto de Ciencia Molecular, Universidad de Valencia, c/ Catedrático José Beltrán, 2, 46100 Burjassot, Spain.*

### **Supporting Information**

#### **General reverse-micelle protocol for the preparation of [Fe(Htrz)<sub>2</sub>(trz)](BF<sub>4</sub>)·H<sub>2</sub>O (1) NPs.**

- S1. Size analysis and elemental analysis.
- S2. Stabilization time for the Fe<sup>II</sup> microemulsions as a function of the metal concentration (0.1–1.5 M).
- S3. Images of microemulsion stabilization.

#### **Controlling size in [Fe(Htrz)<sub>2</sub>(trz)](BF<sub>4</sub>)·H<sub>2</sub>O NPs: size effect of $\omega_0$ variation.**

- S4. Size analysis and elemental analysis.
- S5. XRPD analysis.
- S6. HR-TEM analysis.
- S7. AFM analysis.

#### **References**

## General reverse-micelle protocol for the preparation of $[\text{Fe}(\text{Htrz})_2(\text{trz})](\text{BF}_4)\cdot\text{H}_2\text{O}$ (1) NPs.

**Table S1.** Size (DLS-based) and elemental analysis for NPs synthesized with different  $[\text{Fe}]$ .

| $[\text{Fe}]$ | Size (nm) | Elemental analysis                                                                                   | C [%] | N [%] | H [%] | S [%] | MW     |
|---------------|-----------|------------------------------------------------------------------------------------------------------|-------|-------|-------|-------|--------|
| 0.5           | 25        | experimental                                                                                         | 33.57 | 22.39 | 4.49  | 3.21  |        |
|               |           | $[\text{Fe}(\text{Htrz})_2(\text{trz})](\text{BF}_4)\cdot\text{H}_2\text{O}\cdot(\text{AOT})_{0.6}$  | 34.18 | 19.93 | 4.97  | 3.04  | 635,79 |
| 1             | 15        | experimental                                                                                         | 19.87 | 32.31 | 3.13  | 0.22  |        |
|               |           | $[\text{Fe}(\text{Htrz})_2(\text{trz})](\text{BF}_4)\cdot\text{H}_2\text{O}\cdot(\text{AOT})_{0.02}$ | 20.51 | 33.64 | 2.62  | 0.17  | 374,73 |
| 1.5           | 11        | experimental                                                                                         | 19.08 | 30.85 | 2.39  | 0.41  |        |
|               |           | $[\text{Fe}(\text{Htrz})_2(\text{trz})](\text{BF}_4)\cdot\text{H}_2\text{O}\cdot(\text{AOT})_{0.04}$ | 21.29 | 32.86 | 2.75  | 0.33  | 383,62 |

**Figure S2.** Representation of the stabilization time for the  $\text{Fe}^{\text{II}}$  microemulsions as a function of the metal concentration (0.1–1.5 M) with  $\omega_0 = 5$  (the black line serves as a reference to linearity).

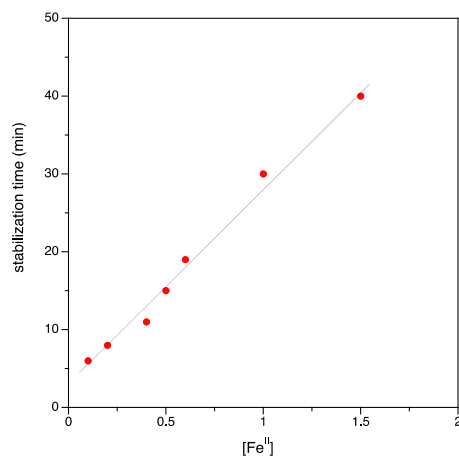

**Figure S3.** Pictures of the two micellar solutions before (a) and after (b) micelle stabilization upon stirring showing the difference in transparency.

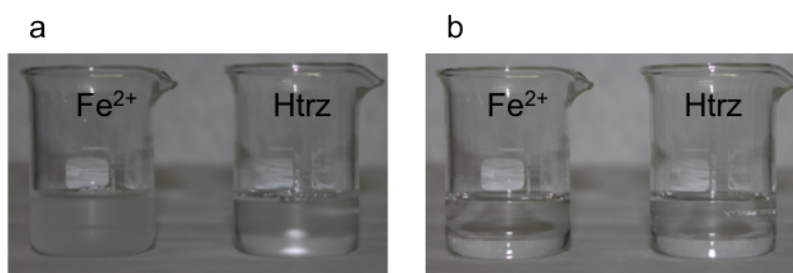

## Controlling size in $[\text{Fe}(\text{Htrz})_2(\text{trz})](\text{BF}_4)$ NPs: size effect of $\omega_0$ variation.

**Table S4.** Table of size and elemental analysis for samples **1.16**, **1.10** and **1.2**.

| Sample      | Size (nm) | Elemental analysis | C [%] | N [%] | H [%] | S [%] | MW |
|-------------|-----------|--------------------|-------|-------|-------|-------|----|
| <b>1.16</b> | 16        | experimental       | 25.59 | 28.93 | 3.48  | 1.77  |    |
| <b>1.10</b> | 10        | experimental       | 26.24 | 28.82 | 3.38  | 1.66  |    |

|             |   |                                                                                                         |       |       |      |      |        |
|-------------|---|---------------------------------------------------------------------------------------------------------|-------|-------|------|------|--------|
| <b>1.2</b>  | 4 | experimental                                                                                            | 29.63 | 26.13 | 3.99 | 2.54 |        |
| Theoretical |   | $[\text{Fe}(\text{Htrz})_2(\text{trz})](\text{BF}_4) \cdot \text{H}_2\text{O} \cdot (\text{AOT})_{0,2}$ | 26,74 | 28,06 | 6,68 | 0,71 | 449,25 |
| Theoretical |   | $[\text{Fe}(\text{Htrz})_2(\text{trz})](\text{BF}_4) \cdot \text{H}_2\text{O} \cdot (\text{AOT})_{0,3}$ | 28,87 | 25,25 | 4,06 | 1,93 | 499,21 |

**Figure S5.** X-ray powder diffraction (XRPD) patterns of samples **1.6** (16 nm), **1.10** (10 nm) and **1.2** (4 nm) obtained on powdered samples. The patterns of the NPs bearing different sizes are compared with the experimental pattern of microcrystalline powder of  $[\text{Fe}(\text{Htrz})_2(\text{trz})](\text{BF}_4) \cdot \text{H}_2\text{O}$  (**1**) obtained as bulk.<sup>1</sup>

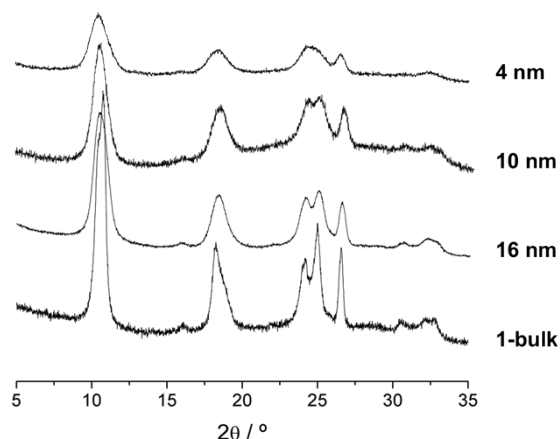

**Figure S6.** HR-TEM image of sample **1a** (ca. 16 nm) showing the two different orientations (parallel or standing) after sample deposition by drop casting. These two different orientations have been also observed by some of us in self-assembled monolayers of these NPs, using high-angle annular dark field scanning transmission electron microscopy (STEM-HAADF).<sup>2</sup>

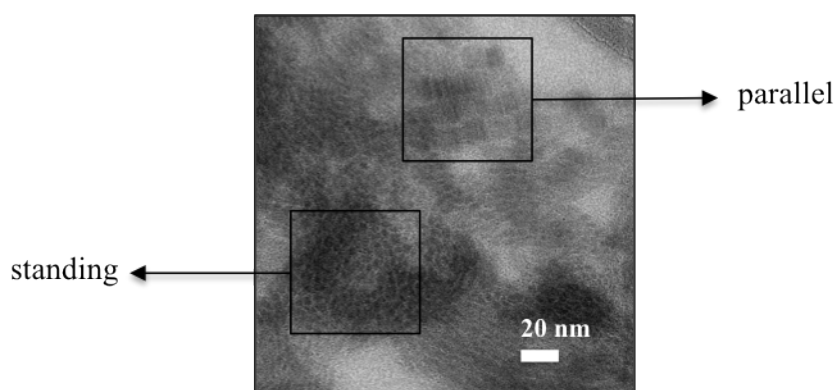

**Figure S7.** AFM (topography (a) and phase (b)) images measured in tapping mode for SCO-NPs (sample **1.16**, 16 nm) deposited by drop casting on native  $\text{SiO}_2$ .

*Silicon substrate cleaning process.* Substrates of ca. 1 cm<sup>2</sup> were sonicated for 10 minutes in a freshly-prepared  $\text{H}_2\text{O}_2:\text{NH}_4\text{OH}:\text{H}_2\text{O}$  (1:1:2) solution (x3 times). The substrates are then rinsed with mili-Q water, sonicated 5 minutes in mili-Q water (x2 times) and finally dried under a  $\text{N}_2$  stream (*ultrasonic cleaner*: BRANASONIC MTH-5510 ultrasonic cleaner, power 185 W).

*Drop casting deposition:* A drop of the SCO-NP suspension is dropped on top of the substrate and left unperturbed for 30 second. Then, the substrate is rinsed with *n*-octane and dried under a N<sub>2</sub> stream.

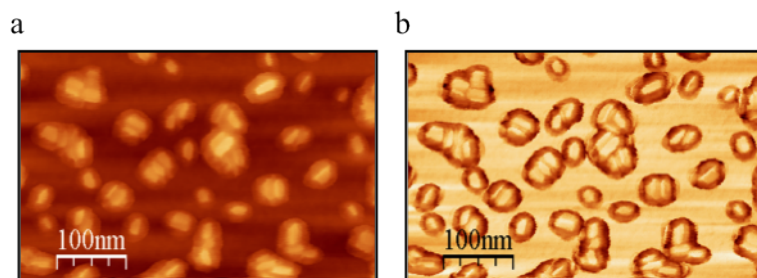

---

## References

- <sup>1</sup> A. Grosjean, P. Négrier, P. Bordet, C. Etrillard, D. Mondieig, S. Pechev, E. Lebraud, J.-F. Létard, P. Guionneau, *Chem. Commun.* **2011**, 47, 12382.
- <sup>2</sup> J. Dugay, M. Giménez-Marqués, T. Kozlova, H. W. Zandbergen, E. Coronado, H. S. J. van der Zant, *Adv. Mater.* **2015**, 27, 1288.
